# Supplementary material for: Linear ubiquitin chain assembly complex coordinates late thymic T-cell differentiation and regulatory T-cell homeostasis
Source: PubMed Central journal article supplement (PMC5120208; doi:10.1038/ncomms13353), 2016-11-18
Supplement: ncomms13353-s1.pdf [file ncomms13353-s1.pdf]

## SUPPLEMENTARY INFORMATION

### Supplementary Figures

#### Supplementary Figure 1

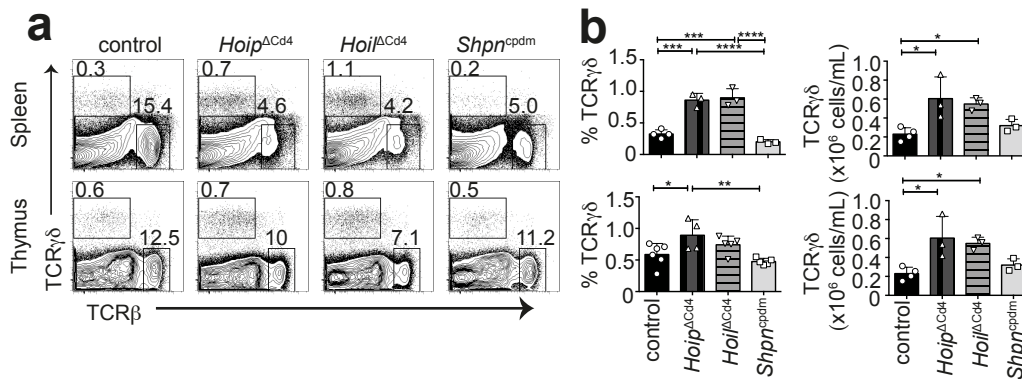

**Supplementary Figure 1.** (A) Surface expression of TCR $\delta$  and TCR $\beta$  on splenocytes (top panel) and thymocytes (bottom panel) of 7-15 week-old control, *Hoip* $\Delta$ Cd4, *Hoi* $\Delta$ Cd4 and *Sharpin*<sup>cpdm</sup> mice. (B) Percentages (left panels) and total numbers (right panels) of TCR $\gamma\delta$  cells in spleen (top) and thymus (bottom) of control, *Hoip* $\Delta$ Cd4, *Hoi* $\Delta$ Cd4 and *Sharpin*<sup>cpdm</sup> mice. Each symbol represents an individual mouse; small horizontal lines indicate mean $\pm$ s.d.; \*, \*\*, \*\*\* and \*\*\*\* denotes p<0.05, p<0.01, p<0.005 and p<0.001, respectively. One-way ANOVA with a Tukey's post hoc test for multiple comparisons was used for statistical analysis. *Shpn*<sup>cpdm</sup> refers to *Sharpin*<sup>cpdm</sup> mice. Data are representative of 2 independent experiments with 4-6 mice per group.

## Supplementary Figure 2.

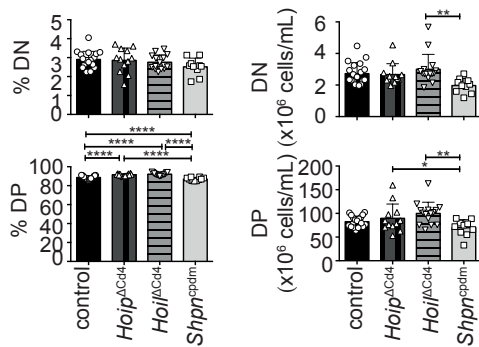

**Supplementary Figure 2.** Quantification of total cell numbers and percentages of DN (CD4<sup>-</sup>CD8<sup>-</sup>) and DP (CD4<sup>+</sup>CD8<sup>+</sup>) thymocytes from control, *Hoip*<sup>ΔCd4</sup>, *Hoil*<sup>ΔCd4</sup> and *Shprn*<sup>cpdm</sup> mice. Each symbol represents an individual mouse; small horizontal lines indicate mean±s.d.; \*, \*\*, \*\*\* and \*\*\*\* denotes p<0.05, p<0.01, p<0.001 and p<0.005, respectively. One-way ANOVA with a Tukey's post hoc test for multiple comparisons was used for statistical analysis. *Shprn*<sup>cpdm</sup> refers to *Shprn*<sup>cpdm</sup> mice. Data are pooled from 6 independent experiments with 2-6 mice per group.

### Supplementary Figure 3.

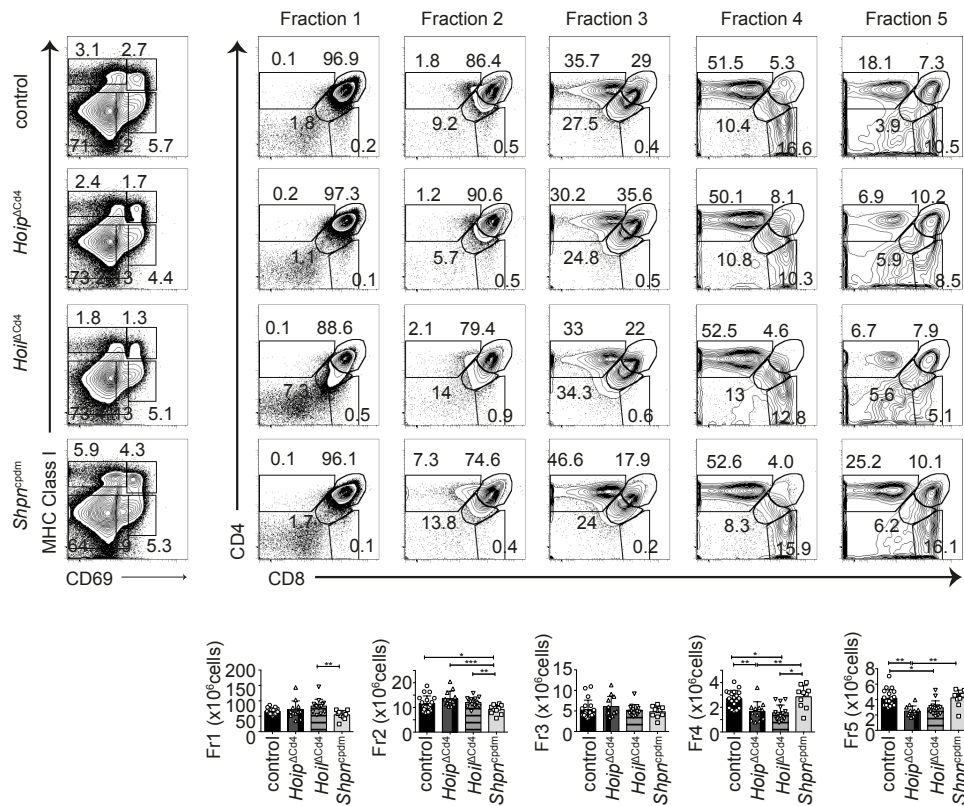

**Supplementary Figure 3.** Expression of MHC Class I (H2-K<sup>b</sup>) and CD69 on total control, *Hoip*<sup>ΔCd4</sup>, *Hoil*<sup>ΔCd4</sup> and *Sharpin*<sup>cpdm</sup> thymocytes analyzed by flow cytometry, delineating five fractions. The corresponding surface expression of CD4 and CD8 on fractions 1-5 is indicated. The fractions are enumerated in the bar graphs below, with each symbol representing an individual mouse; small horizontal lines indicate mean $\pm$ s.d.; \*, \*\*, \*\*\* and \*\*\*\* denotes  $p < 0.05$ ,  $p < 0.01$ ,  $p < 0.005$  and  $p < 0.001$ , respectively. One-way ANOVA with a Tukey's post hoc test for multiple comparisons was used for statistical analysis. *Shpn*<sup>cpdm</sup> refers to *Sharpin*<sup>cpdm</sup> mice. Data are pooled from 6 independent experiments with 2-6 mice per group.

## Supplementary Figure 4

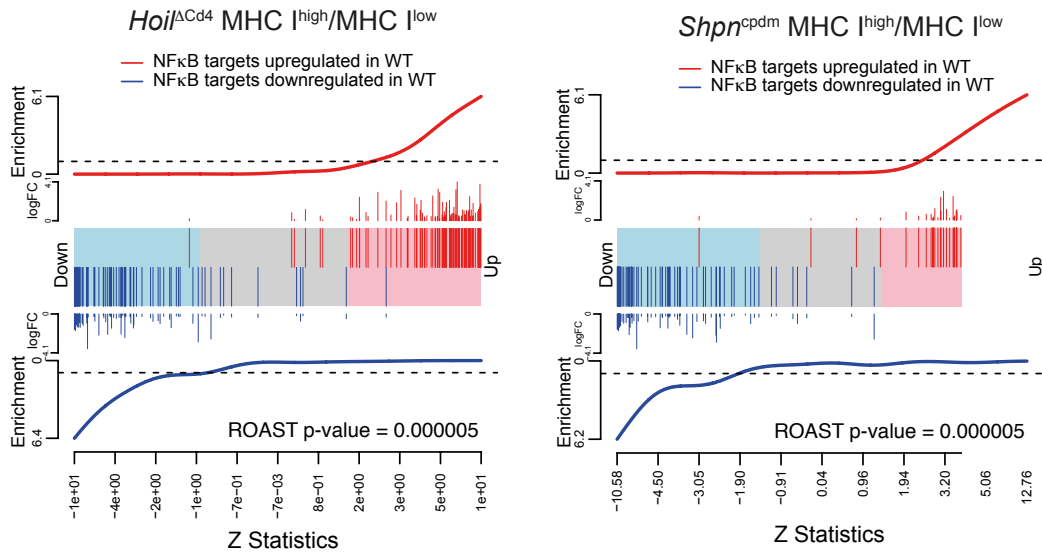

**Supplementary Figure 4.** Barcode plots showing that the transcriptional profile of NF- $\kappa$ B target genes for MHC I<sup>high</sup> vs MHC I<sup>low</sup> CD69<sup>+</sup> thymocytes in WT mice is preserved in *Hoi1*<sup>ΔCd4</sup> (right) and *Sharpin*<sup>cpdm</sup> (left) mice. In each plot, all genes in the genome are ordered from most up-regulated in MHC I<sup>high</sup> (right) to most down-regulated in MHC I<sup>high</sup> (left), in the mutant mice. Vertical bars show the rank positions of NF- $\kappa$ B genes that are up-regulated (red) or down-regulated (blue) for the same comparison in WT. The log<sub>2</sub>-fold-change of each gene in WT is also shown. The worms show relative enrichment.

**Supplementary Figure 5**

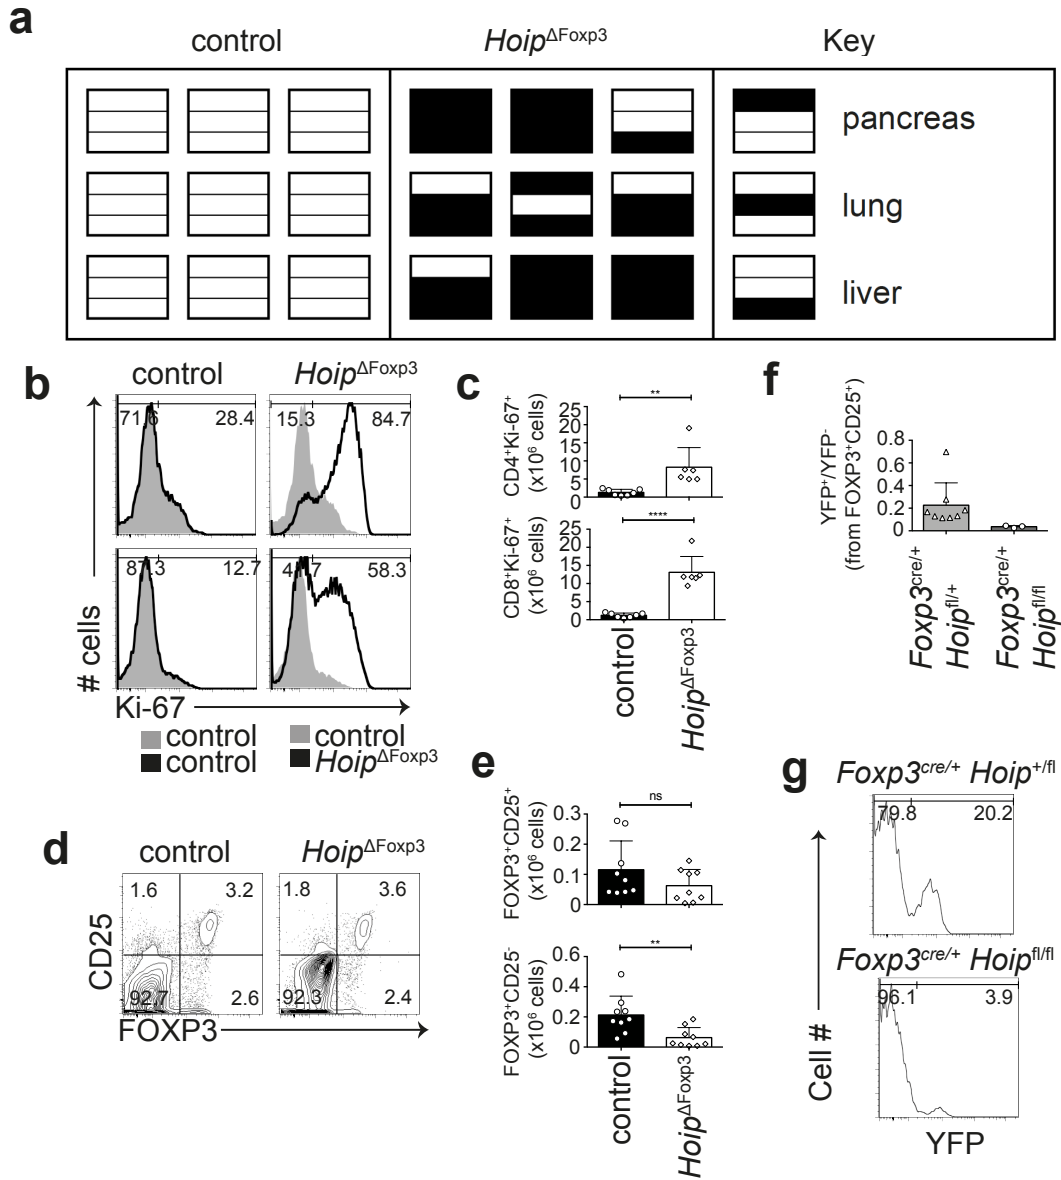

**Supplementary Figure 5.** (a) Summary of immune infiltration detected in the pancreas, lung and liver for *Hoip*<sup>ΔFoxp3</sup> mice and littermate controls. Each sector represents the detection of lymphocytic infiltration in a single mouse and shaded sections denote the presence of infiltration. (b) Expression of Ki-67 on CD4<sup>+</sup>FOXP3<sup>-</sup> (top panel) and CD8<sup>+</sup> (bottom panel) cells and (c) absolute

numbers of Ki-67<sup>high</sup> cells in the spleen from wild-type (grey shaded histogram) and *Hoip*<sup>ΔFoxp3</sup> (black thick histogram) mice. **(d)** CD25 and FOXP3 expression of thymic CD4<sup>+</sup> cells from *Hoip*<sup>ΔFoxp3</sup> mice. **(e)** Number of thymic FOXP3<sup>+</sup>CD25<sup>+</sup> Treg cells. **(f)** Ratio of YFP<sup>+</sup>/YFP<sup>-</sup> cells on CD4<sup>+</sup>CD25<sup>+</sup> cells in the blood of *Foxp3*<sup>cre/+</sup>*Hoip*<sup>+/fl</sup> and *Foxp3*<sup>cre/+</sup>*Hoip*<sup>fl/fl</sup> mice. **(g)** Representative histograms of YFP expression in CD4<sup>+</sup>CD25<sup>+</sup> cells in the spleen of *Foxp3*<sup>cre/+</sup>*Hoip*<sup>+/fl</sup> and *Foxp3*<sup>cre/+</sup>*Hoip*<sup>fl/fl</sup> mice. *Shpn*<sup>cpdm</sup> refers to *Sharpin*<sup>cpdm</sup> mice. Data are representative of 3 independent experiments with 1-3 mice per group **(a-e)** or 1 experiment with 3-8 mice per group **(f-g)**. One-way ANOVA with a Tukey's post hoc test for multiple comparisons was used for statistical analysis.

## Supplementary Figure 6

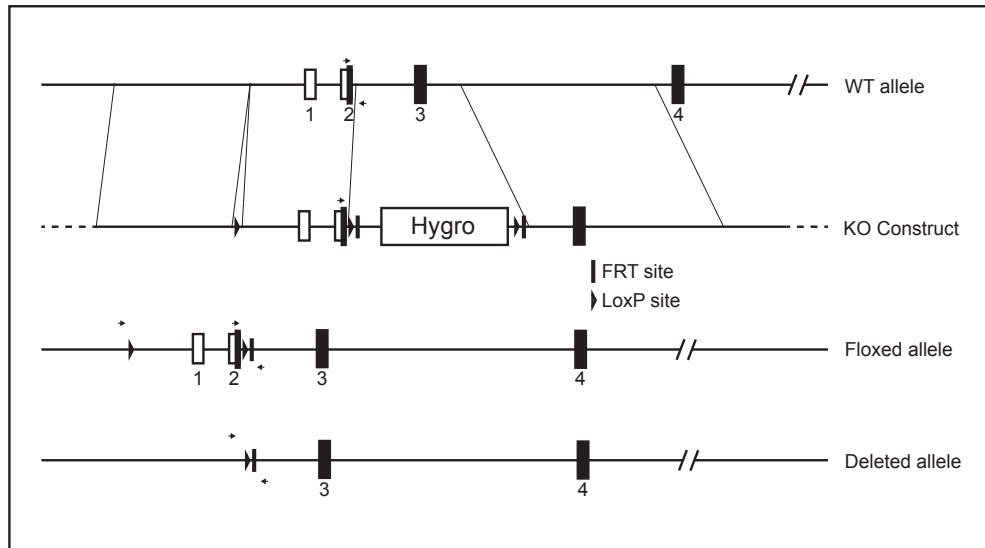

**Supplementary Figure 6.** Targeting strategy and generation of *Hoil-1* (*Rbck1*) floxed mice. Schematic diagram depicting the *Rbck1* locus targeting strategy. Open boxes represent non-coding parts of exons 1 and 2, black boxes represent coding part of exons 2, 3 and 4. Targeting construct contains a hygromycin resistance selection cassette (FRT/pGK-Hygro/LoxP/FRT), whereas triangles and small rectangles indicate the loxP sites and frt sites, respectively. Arrowheads indicate the positions of the primers used for genotyping.

## Supplementary Figure 7

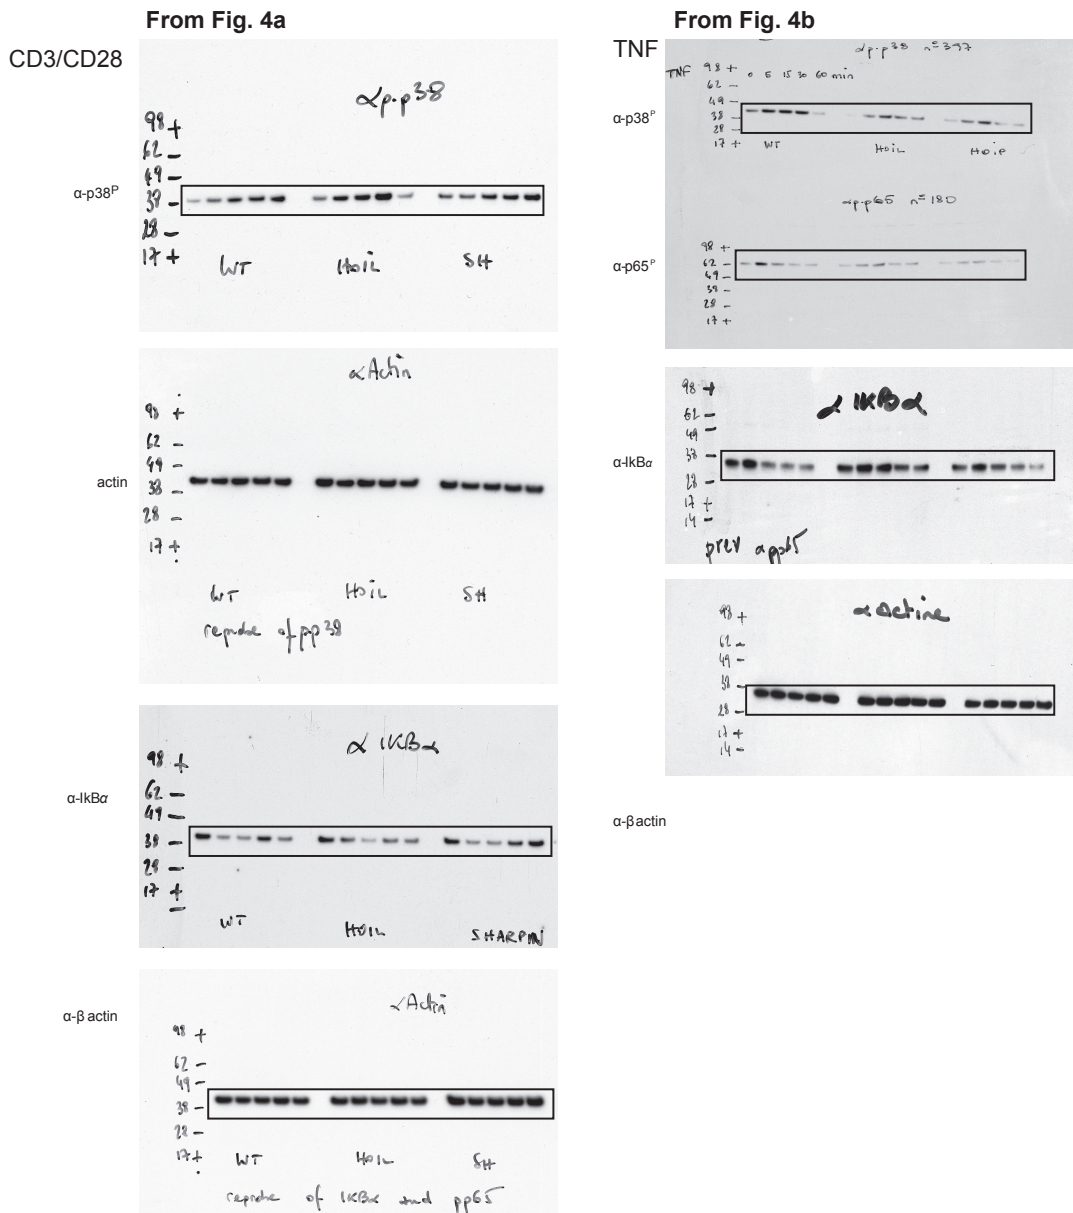

**Supplementary Figure 7. Original Western blots images used in Figure 4a and b. Blocks indicate specific bands in the main figure.**
